# Supplementary material for: Microphysical Characteristics of Frozen Droplet Aggregates from Deep Convective Clouds
Source: Copernicus journal article supplement (doi:10.5194/acp-2018-5), 2018-02-02
Supplement: Supplementary file [file acp-2018-5-AC3-supplement.pdf]

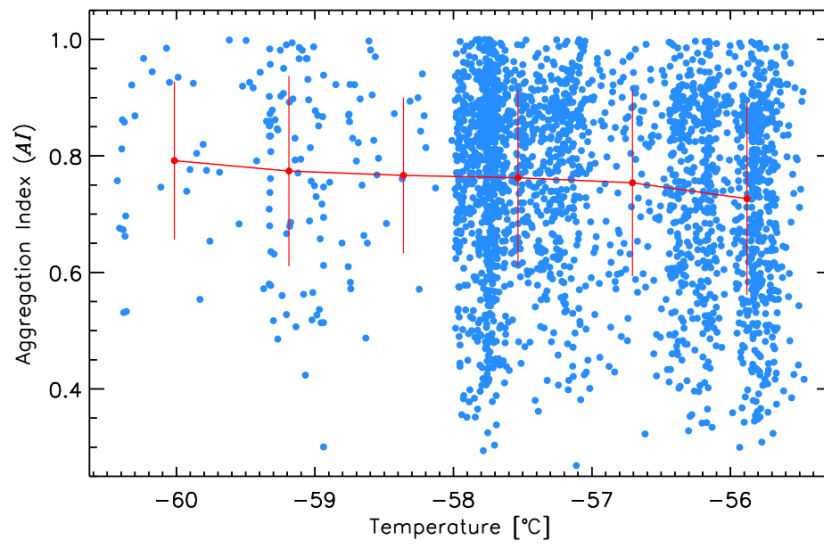

Figure 9: The average aggregation index (AI, red circles in Fig. 8) as a function of temperature (blue circles). The mean and standard deviation of  $AI$  for six temperature ranges are indicated with red circles and vertical bars.
